# Supplementary material
Source: Springer Nature journal article supplement (https://www.springermedizin.de/resource/supplementary/12958_2009_551_MOESM8_ESM.pdf/9568294)

## Human

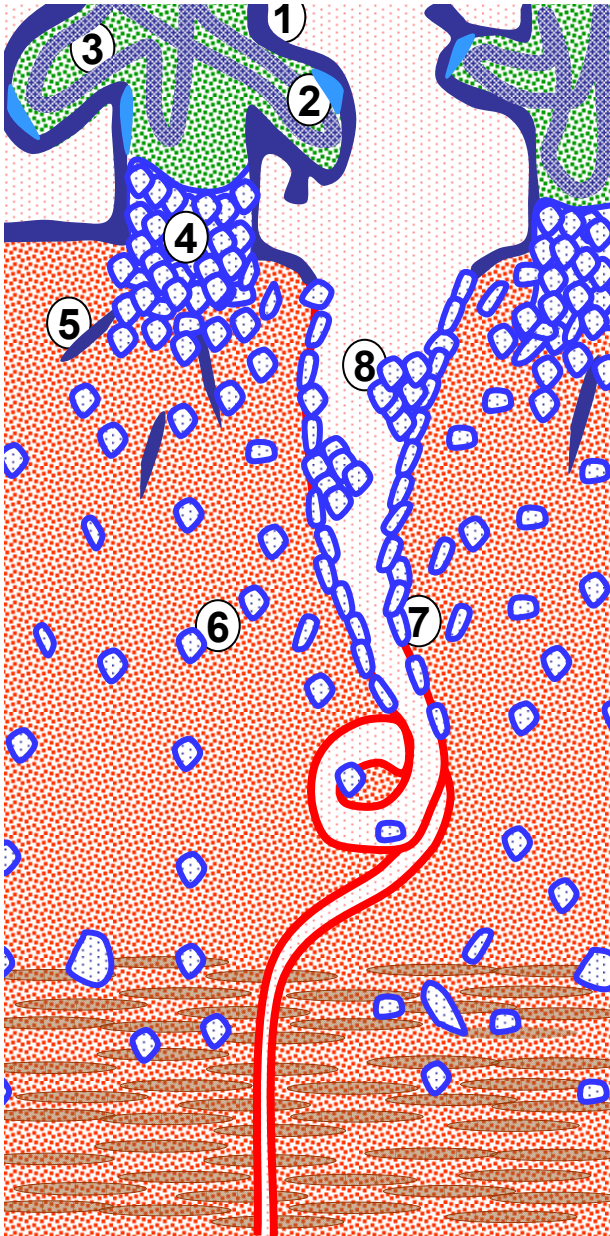

### (1) Villous STB / Labyrinthine STB

COX, eNOS, KAL/B2R, ANG-(1-7), ACE2, VEGF/KDR

### (2) Villous CTB / Labyrinthine CTB

COX, eNOS, B2R, ANG-(1-7), ACE2, VEGF/KDR, KAL

### (3) Fetoplacental endothelium

COX, eNOS, KAL/B2R, ANG-(1-7), ACE2, VEGF/KDR

### (4) Cell columns / Subplacental CTB

eNOS, ANG-(1-7), ACE2, VEGF/KDR, KAL, B2R

### (5) Invasive STB / Syncytial streamers

eNOS, KAL/B2R, ANG-(1-7), ACE2, VEGF/KDR →

### (6) Interstitial (invasive extravillous) TB

← COX, eNOS, KAL/B2R, ANG-(1-7), ACE2, VEGF/KDR

### (7) Intramural (invasive) TB

eNOS, KAL/B2R, ANG-(1-7), ACE2, VEGF/KDR →

### (8) Intraarterial (invasive) TB

COX, KAL/B2R, ANG-(1-7), ACE2, VEGF/KDR, eNOS

### (9) Perivascular (invasive) TB

eNOS, KAL/B2R, ANG-(1-7), ACE2, VEGF/KDR →

## Guinea pig

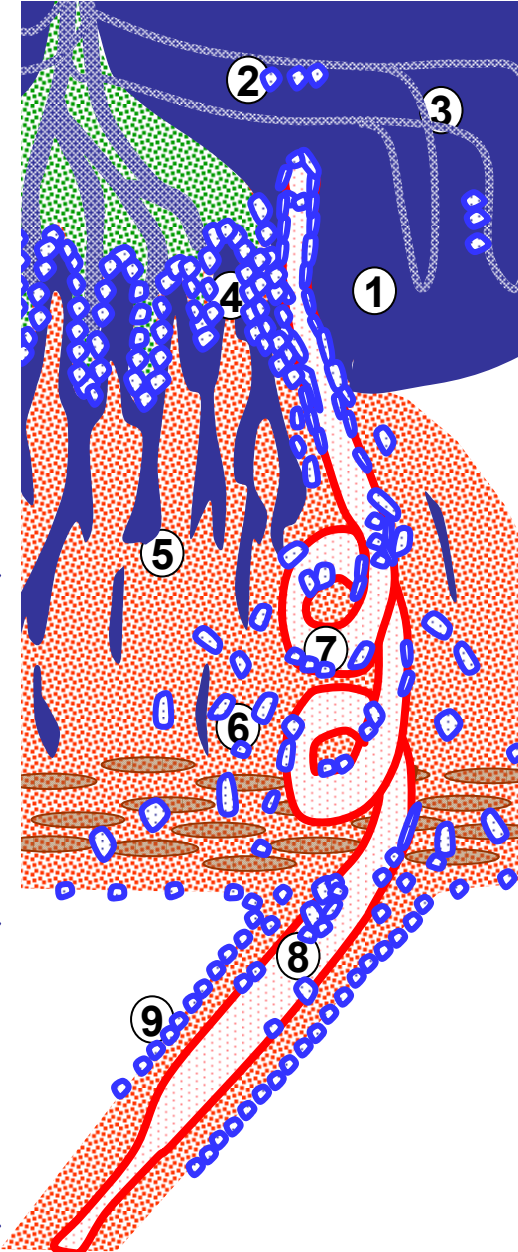

Supplement: MOESM8 [file 9568294]
